# Supplementary material for: AT1 receptor blocker, but not an ACE inhibitor, prevents kidneys from hypoperfusion during congestive heart failure in normotensive and hypertensive rats
Source: PubMed Central journal article supplement (PMC7896062; doi:10.1038/s41598-021-83906-6), 2021-02-19

***Supplementary materials for:***

**AT<sub>1</sub> receptor blocker, but not an ACE inhibitor, prevents kidneys from hypoperfusion during congestive heart failure in normotensive and hypertensive rats**

Vojtech Kratky<sup>1,2,3</sup>, Zdenka Vanourkova<sup>1</sup>, Matus Sykora<sup>4</sup>, Barbara Szeiffova Bacova<sup>4</sup>, Zdenka Hruskova<sup>3</sup>, Sona Kikerlova<sup>1</sup>, Zuzana Huskova<sup>1</sup>, Libor Kopkan<sup>1</sup>

<sup>1</sup> Center for Experimental Medicine, Institute for Clinical and Experimental Medicine, Prague, Czech Republic.

<sup>2</sup> Department of Pathophysiology, 2nd Faculty of Medicine, Charles University, Prague, Czech Republic.

<sup>3</sup> Department of Nephrology, First Faculty of Medicine, Charles University and General University Hospital in Prague, Prague, Czech Republic

<sup>4</sup> Institute for Heart Research, Centre of Experimental Medicine, Slovak Academy of Sciences, Bratislava, Slovak republic

Author for correspondence:

Vojtech Kratky, M.D.

Center for Experimental Medicine, Institute for Clinical and Experimental Medicine, 1958/9 Videnska, CZ-140 00 Prague 4, Czech Republic.

Email: [Vojtech.Kratky@vfn.cz](mailto:Vojtech.Kratky@vfn.cz)

**Supplementary Table 1** Organ weights of control, untreated heart failure (HF), ACE inhibitor-treated (HF + ACEi) and AT<sub>1</sub> receptor blocker-treated (HF + ARB) HanSD and TGR rats. Please note that data from HF TGR rats were obtain in 5 weeks after ACF induction due to high mortality.

|                             | HanSD rats |              |                |              | TGR rats     |              |                |                |
|-----------------------------|------------|--------------|----------------|--------------|--------------|--------------|----------------|----------------|
|                             | Control    | HF           | HF + ACEi      | HF + ARB     | Control      | HF           | HF + ACEi      | HF + ARB       |
| Heart weight (mg)           | 1543 ± 115 | 2782 ± 481 * | 2306 ± 196 * # | 2514 ± 256 * | 1950 ± 131 ¥ | 2468 ± 337 * | 2149 ± 257 * # | 2202 ± 272 * # |
| Left ventricle weight (mg)  | 1108 ± 78  | 1760 ± 232 * | 1527 ± 114 * # | 1660 ± 147 * | 1482 ± 85 ¥  | 1687 ± 159 * | 1418 ± 157 # ¥ | 1481 ± 178 # ¥ |
| Right ventricle weight (mg) | 309 ± 31   | 625 ± 126 *  | 522 ± 54 * #   | 572 ± 76 *   | 315 ± 30 *   | 490 ± 106 *  | 519 ± 124 *    | 492 ± 75 *     |
| Lung weight (mg)            | 1987 ± 126 | 2578 ± 623 * | 2216 ± 216 #   | 2278 ± 172 # | 2057 ± 182   | 2558 ± 638 * | 2333 ± 235 #   | 2331 ± 171 #   |
| Liver weight (g)            | 16.8 ± 2.0 | 18.3 ± 7.2   | 17.1 ± 2.5     | 16.8 ± 2.1   | 20.0 ± 1.3   | 17.1 ± 3.5   | 17.8 ± 2.7     | 19.1 ± 2.3     |
| Kidney weight (mg)          | 1933 ± 182 | 1801 ± 229   | 1918 ± 233     | 1887 ± 170   | 2134 ± 76    | 1740 ± 164   | 1863 ± 227     | 1984 ± 153     |

Values are expressed as mean ± standard deviation and consist of ten observations per group. \* p < 0.05 versus control of the same rat strain # p < 0.05 versus HF of the same rat strain ¥ p < 0.05 versus HanSD counterparts.

**Supplementary Figure 1.**

Original unprocessed  
Western blots from main  
Figure 7E.

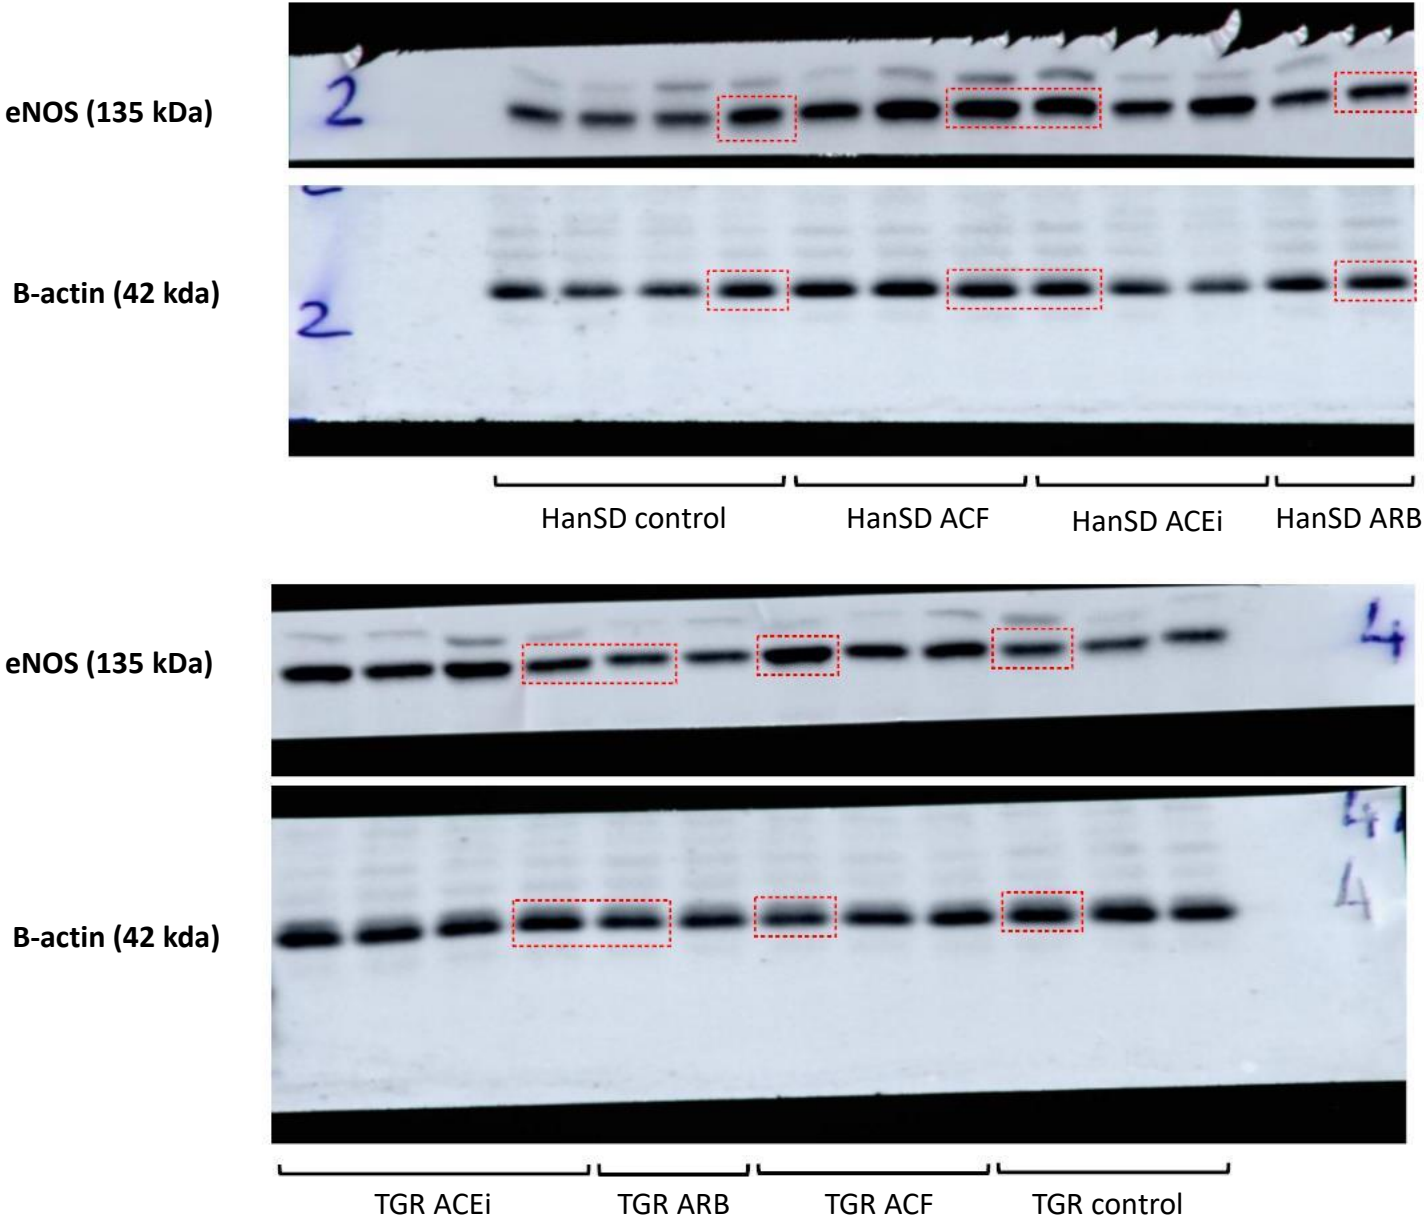

eNOS (135 kDa)

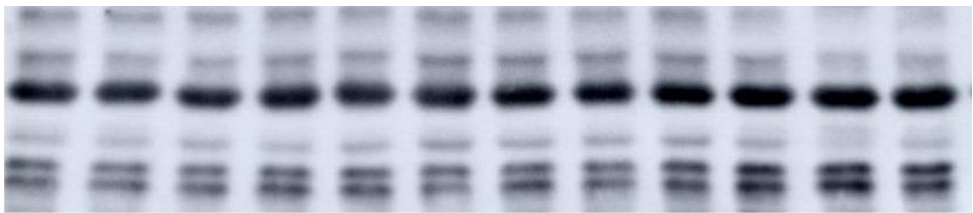

B-actin (42 kDa)

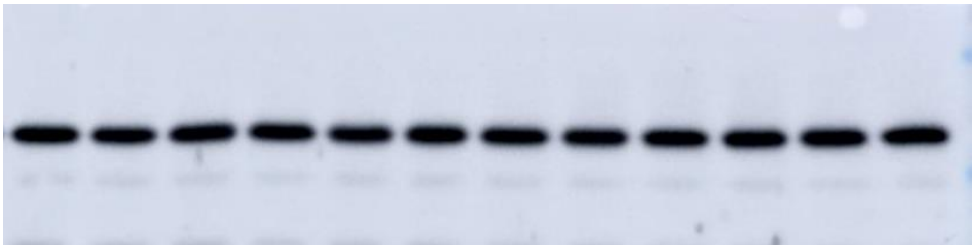

HanSD control

HanSD ACF

HanSD ACEi

eNOS (135 kDa)

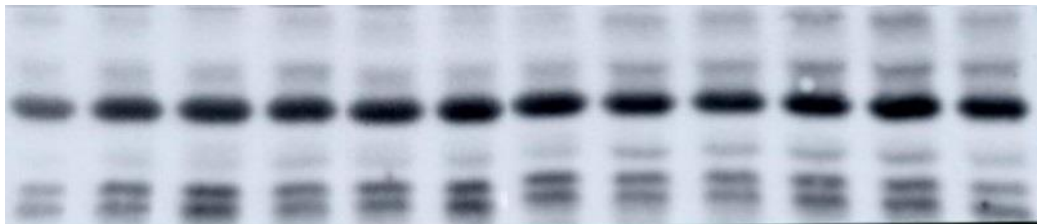

B-actin (42 kDa)

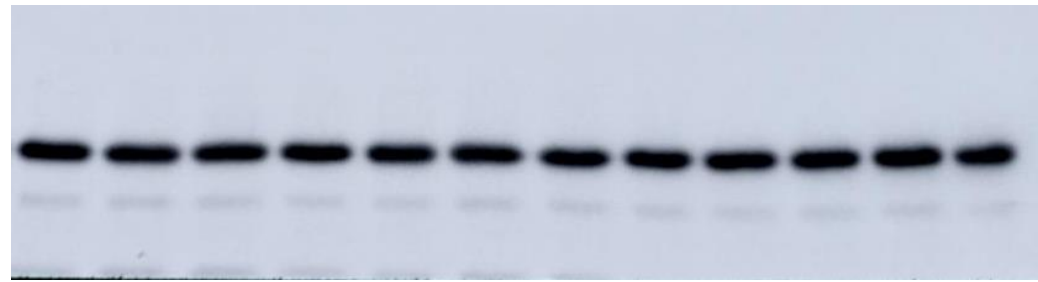

HanSD control

TGR control

HanSD ARB

eNOS (135 kDa)

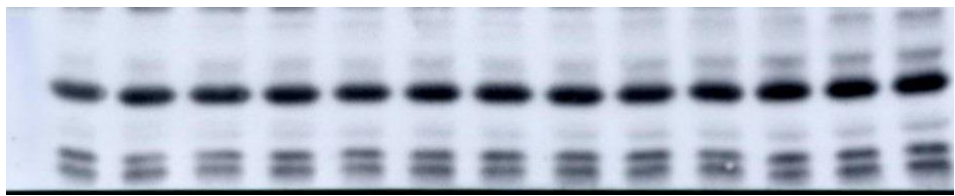

B-actin (42 kDa)

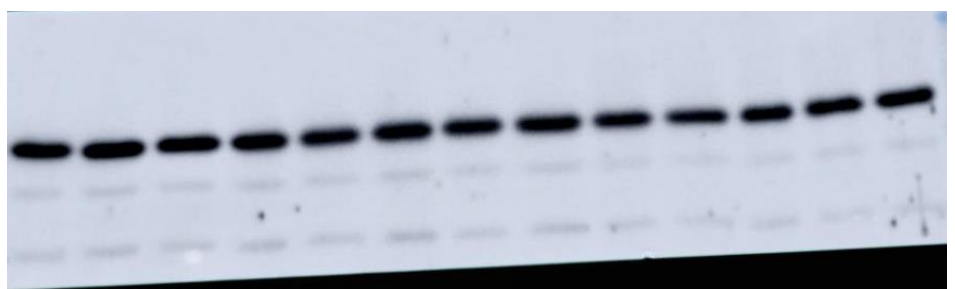

HanSD control

TGR control

TGR ARB

TGR ACEi

eNOS (135 kDa)

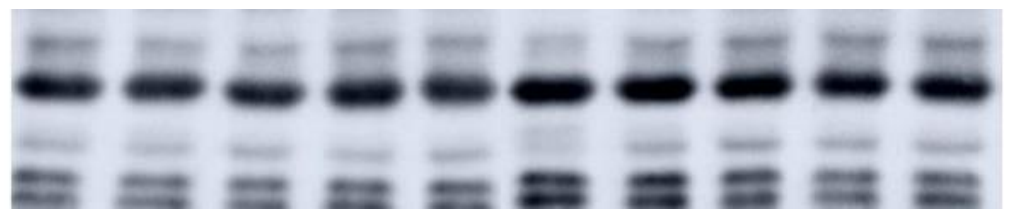

B-actin (42 kDa)

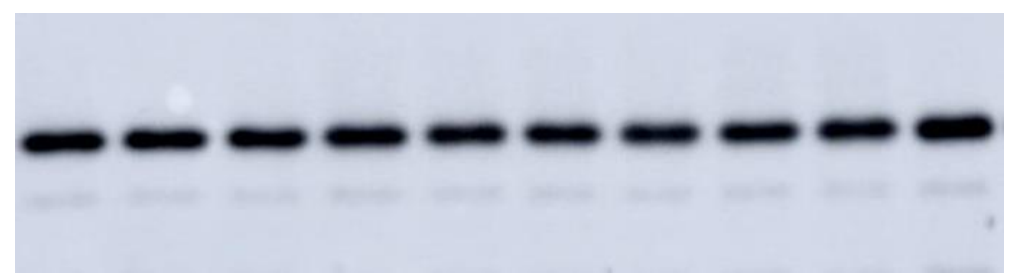

HanSD control

TGR ACF

## Supplementary Figure 2. Experimental protocol

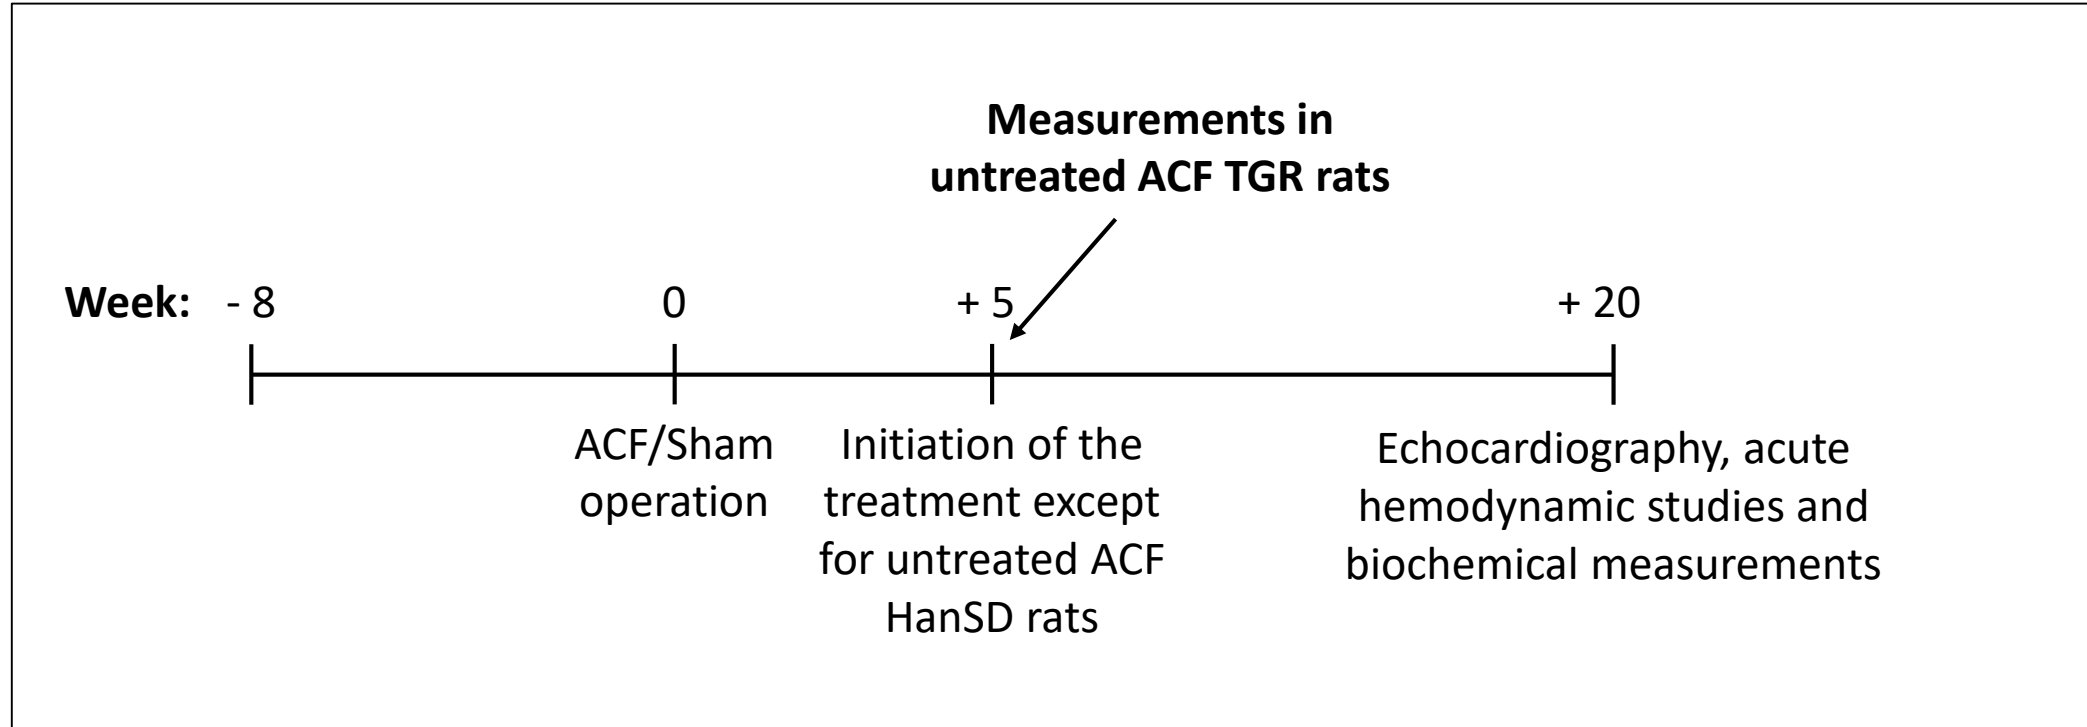

Supplement: 41598_2021_83906_MOESM1_ESM.pdf [file 41598_2021_83906_MOESM1_ESM.pdf]
